# Supplementary material
Source: PubMed Central journal article supplement (PMC4831312)
Supplement: BPH-173-1502-s001.pdf [file BPH-173-1502-s001.pdf]

**Geniposide Protects against Cardiac Hypertrophy via  
GLP-1R/AMPK $\alpha$  Signalling Pathway**

Zhen-Guo Ma<sup>1,2</sup>, MD, PhD, Jia Dai<sup>1,2</sup>, PhD, Wen-Bin Zhang<sup>1,2</sup>, MD,  
Yuan Yuan<sup>1,2</sup>, PhD, Hai-Han Liao<sup>1,2</sup>, MD, Ning Zhang<sup>1,2</sup>, MD,  
Zhou-Yan Bian<sup>1,2</sup>, PhD, Qi-Zhu Tang<sup>1,2</sup>, MD, PhD

<sup>1</sup>Department of Cardiology, Renmin Hospital of Wuhan University, Wuhan, China

<sup>2</sup>Cardiovascular Research Institute of Wuhan University, Wuhan, China

Corresponding author: Qi-Zhu Tang, Department of Cardiology, Renmin Hospital of Wuhan University; Cardiovascular Research Institute, Wuhan University at Jiefang Road 238, Wuhan 430060, China. Tel.: +86 27 88073385; Fax: +86 27 88042292. E-mail: [qztang@whu.edu.cn](mailto:qztang@whu.edu.cn)

Short title: Geniposide against Cardiac Hypertrophy

**SUPPLEMENTAL MATERIAL**

## **SUPPLEMENTAL METHOD**

### ***XBP-1 splicing assay***

The XBP-1 splicing assay was performed according to a previous study. The total RNA was extracted from hearts and cells, and then was reverse-transcribed into cDNA using the Transcriptor First Strand cDNA Synthesis Kit (Roche, 04896866001). Levels of spliced and unspliced XBP-1 by using primers flanking the intron excised by IRE1 exonuclease activity. The running conditions were: 50 °C (30 min); 95 °C (15 min); 30 cycles of 94 °C (1 min), 55 °C (1 min), 72 °C (1min); 72 °C (10 min).

**Table S1: Primer sequences used for RT-PCR**

| Gene                          | Species |         | Sequence (5'-3')          |
|-------------------------------|---------|---------|---------------------------|
| GAPDH                         | Mouse   | Forward | ACTCCACTCACGGCAAATTC      |
|                               |         | Reverse | TCTCCATGGTGGTGAAGACA      |
| GAPDH                         | Rat     | Forward | GACATGCCGCCTGGAGAAAC      |
|                               |         | Reverse | AGCCCAGGATGCCCTTTAGT      |
| ANP                           | Mouse   | Forward | ACCTGCTAGACCACCTGGAG      |
|                               |         | Reverse | CCTTGGCTGTTATCTTCGGTACCGG |
| ANP                           | Rat     | Forward | AAAGCAAACCTGAGGGCTCTGCTCG |
|                               |         | Reverse | TTCGGTACCGGAAGCTGTTGCA    |
|                               |         | Reverse | GCCATTTCTCCGACTTTTCTC     |
| $\beta$ -MHC                  | Mouse   | Forward | CCGAGTCCCAGGTCAACAA       |
|                               |         | Reverse | CTTCACGGGCACCCTTGGA       |
| GRP78                         | Rat     | Forward | TGGAGGTGGGCAAACCAAGACA    |
|                               |         | Reverse | TTGGTTGCTTGTCGCTGGGCAT    |
| XBP-1                         | Rat     | Forward | AAGCGCTGCGGAGGAAACTGAA    |
|                               |         | Reverse | TCGTCAGGATCCAGCGTGTCCATT  |
| GLP-1R                        | Mouse   | Forward | TGCAACCGGACCTTTGATGA      |
|                               |         | Reverse | TTGTAGCACACTACTGGCCC      |
| GLP-1R                        | Rat     | Forward | GCTGCTGTTCGTTATCCCCT      |
|                               |         | Reverse | AGGAAGTTGACCCCGATTGC      |
| AMPK $\alpha$ 1               | Rat     | Forward | ATCCGCAGAGAGATCCAGAA      |
|                               |         | Reverse | CGTCGACTCTCCTTTTCGTC      |
| AMPK $\alpha$ 2               | Rat     | Forward | CGGAGGTCATCTCAGGAAGGCTG   |
|                               |         | Reverse | ACGTGCTCATCGTCGAACGGG     |
| XBP-1<br>(the splicing assay) | Mice    | Forward | GAACCAGGAGTTAAGAACACG     |
|                               |         | Reverse | AGGCAACAGTGTCTCAGAGTCC    |

**Table S2: The information of the primary antibodies used in western**

| Antibody name         | Company                   | Number   | Dilution |
|-----------------------|---------------------------|----------|----------|
| GAPDH                 | Santa Cruz                | sc-25778 | 1:200    |
| PERK                  | Santa Cruz                | sc-13073 | 1:200    |
| phospho-PERK          | Santa Cruz                | sc-32577 | 1:200    |
| GRP78                 | Santa Cruz                | sc-13968 | 1:200    |
| XBP-1                 | Santa Cruz                | sc-7160  | 1:200    |
| ANP                   | Santa Cruz                | sc-20158 | 1:200    |
| AMPK $\alpha$         | Cell Signaling Technology | 2603P    | 1:1000   |
| phospho-AMPK $\alpha$ | Cell Signaling Technology | 2535     | 1:1000   |
| ACC                   | Cell Signaling Technology | 3676P    | 1:1000   |
| phospho-ACC           | Cell Signaling Technology | 3661P    | 1:1000   |
| mTOR                  | Cell Signaling Technology | 2983     | 1:1000   |
| phospho-mTOR          | Cell Signaling Technology | 2971     | 1:1000   |
| ERK                   | Cell Signaling Technology | 4695     | 1:1000   |
| phospho-ERK           | Cell Signaling Technology | 4370P    | 1:1000   |
| ATF6                  | Abcam                     | ab103673 | 1:1000   |

## SUPPLEMENTAL FIGURES AND FIGURE LEGENDS:

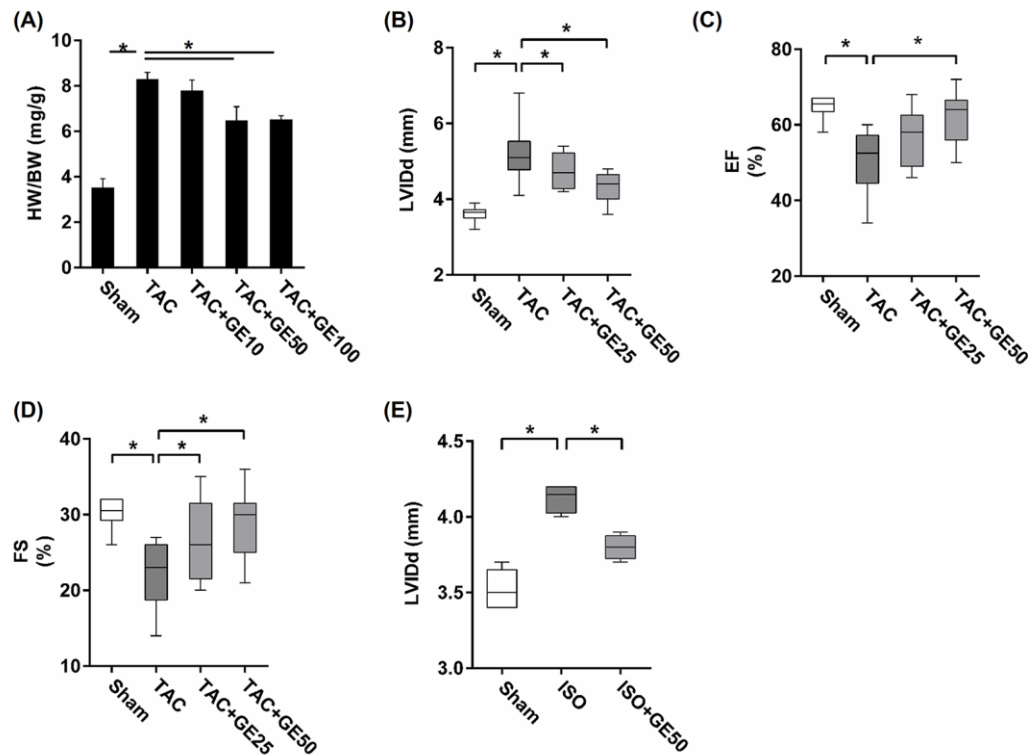

Figure S1. Effects of geniposide (GE) on cardiac hypertrophy induced by pressure overload. HW/BW: heart weight/body weight. A, The preliminary experiment indicated that GE (50mg/kg-100mg/kg) protected against cardiac hypertrophy (n=5). B-D, echocardiographic parameters in mice after 8 weeks of TAC (n=14). E, Left ventricular internal diastolic diameter (LVIDd) in mice subjected to isoprenaline (ISO) injection (n=8). \* $P < 0.05$  versus matched control.

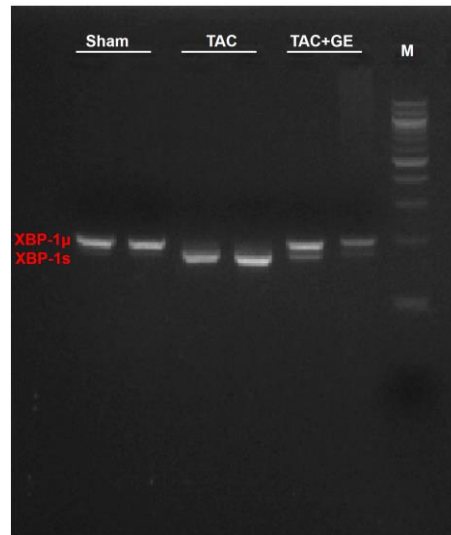

Figure S2. Effects of geniposide (GE) suppressed the production of transcription factor XBP1s. M: marker.

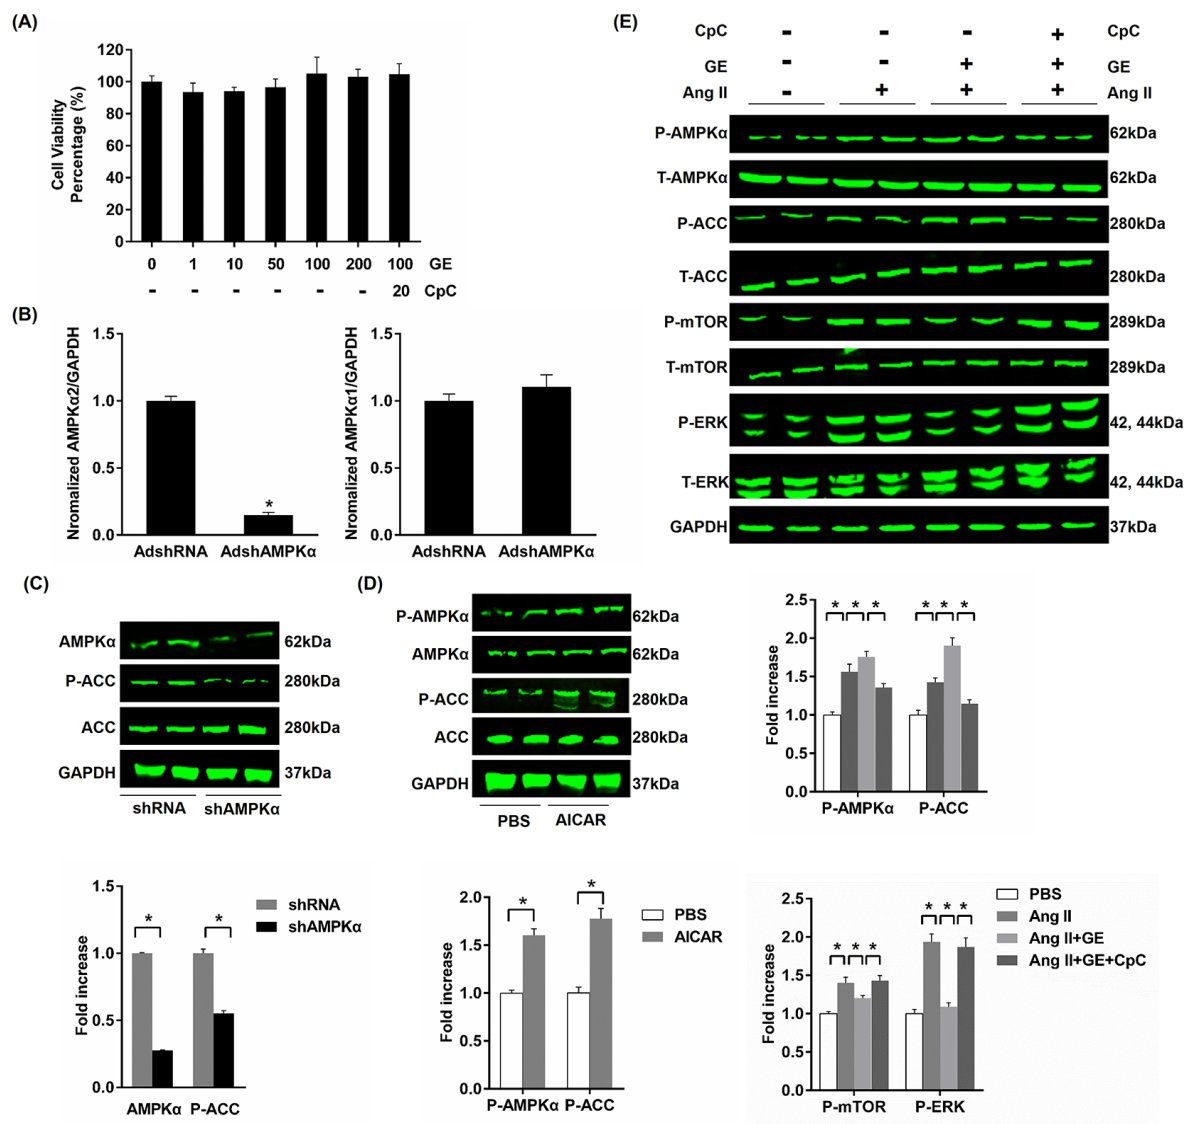

Figure S3. Geniposide (GE) suppressed hypertrophy of myocytes in vitro. A, Viability of H9c2 cells (n=3). B, mRNA of 5'-adenosine monophosphate-activated protein kinase- $\alpha$  (AMPK $\alpha$ )1 and AMPK $\alpha$ 2 after adenovirus infection in neonatal rat cardiac myocytes (n=6). C, Changes of AMPK $\alpha$  and acetyl-CoA carboxylase (ACC) after adenovirus infection in neonatal rat cardiac myocytes (n=6). D, Changes of AMPK $\alpha$  and ACC after AICAR treatment in H9c2 (n=6). E, Phosphorylated AMPK $\alpha$  and downstream proteins after Compound (CpC) treatment in H9c2 cells (n=6). \*  $P < 0.05$  versus matched control.

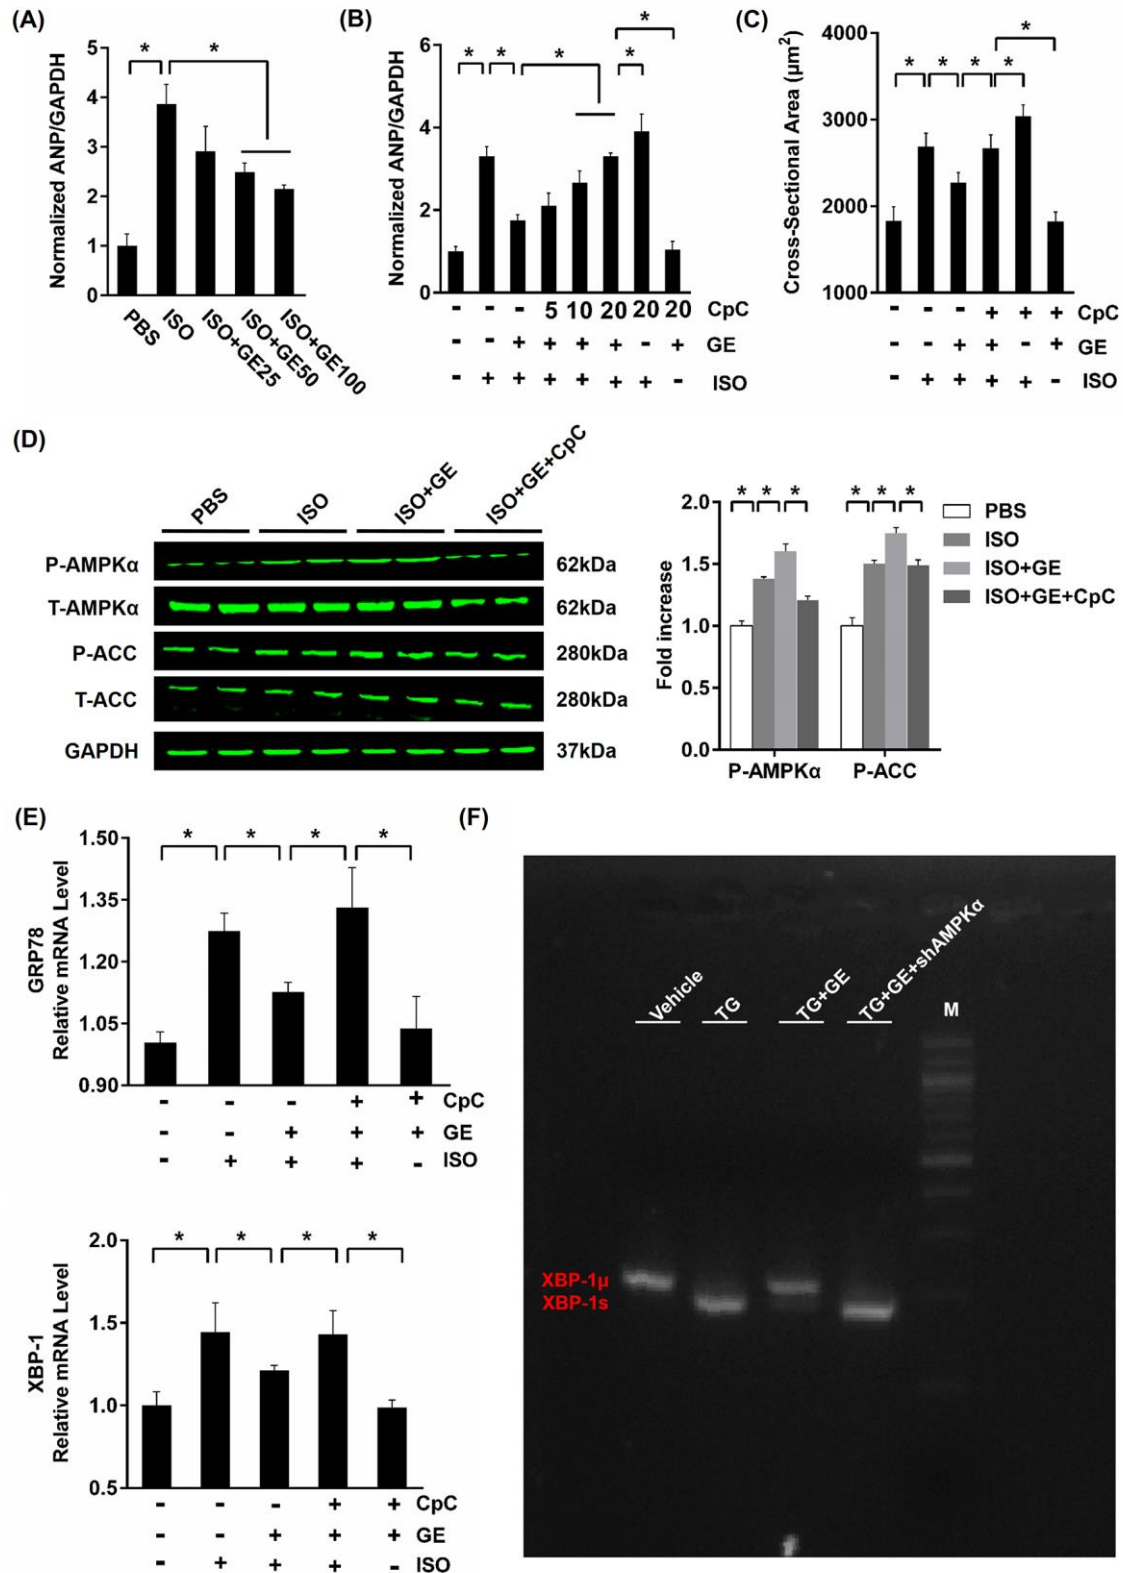

Figure S4. The effects of geniposide (GE) on hypertrophy induced by isoprenaline (ISO) (10mmol/L for 24h) in H9c2 cell. A, The levels of atrial natriuretic peptide (ANP) induced by ISO in indicated groups (n=5). B, Compound (CpC) (5-20  $\mu$ M for 24h) reversed hypertrophic response induced by ISO (n=5). C, The cross-sectional area of H9c2 myocytes (n=5). D, The protein levels of phosphorylated 5'-adenosine

monophosphate-activated protein kinase- $\alpha$  (AMPK $\alpha$ ) in indicated groups (n=6). E, GE suppressed ISO-induced ER stress (n=5). F, shAMPK $\alpha$  offset the effect of GE against the production of transcription factor XBP1s. M: marker. \* $P<0.05$ .

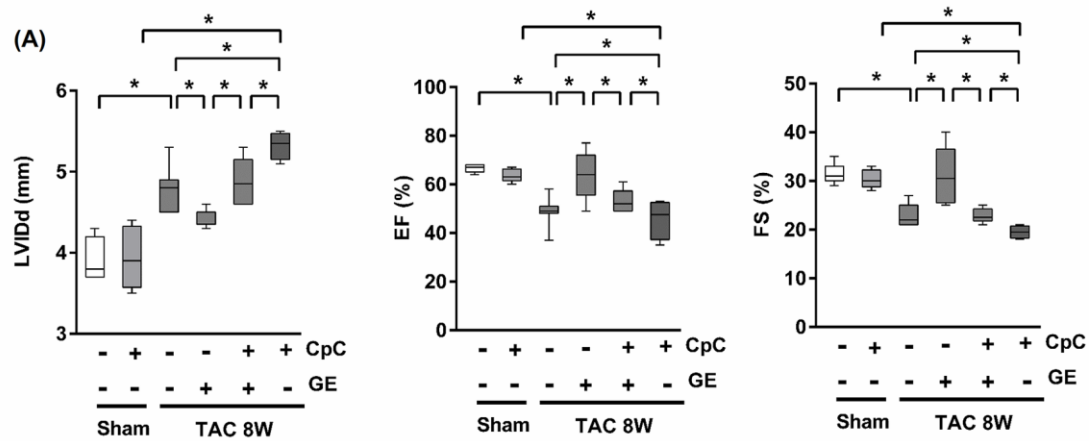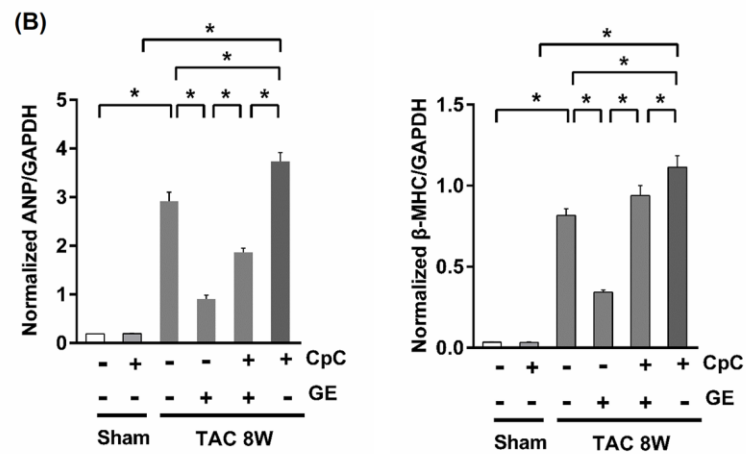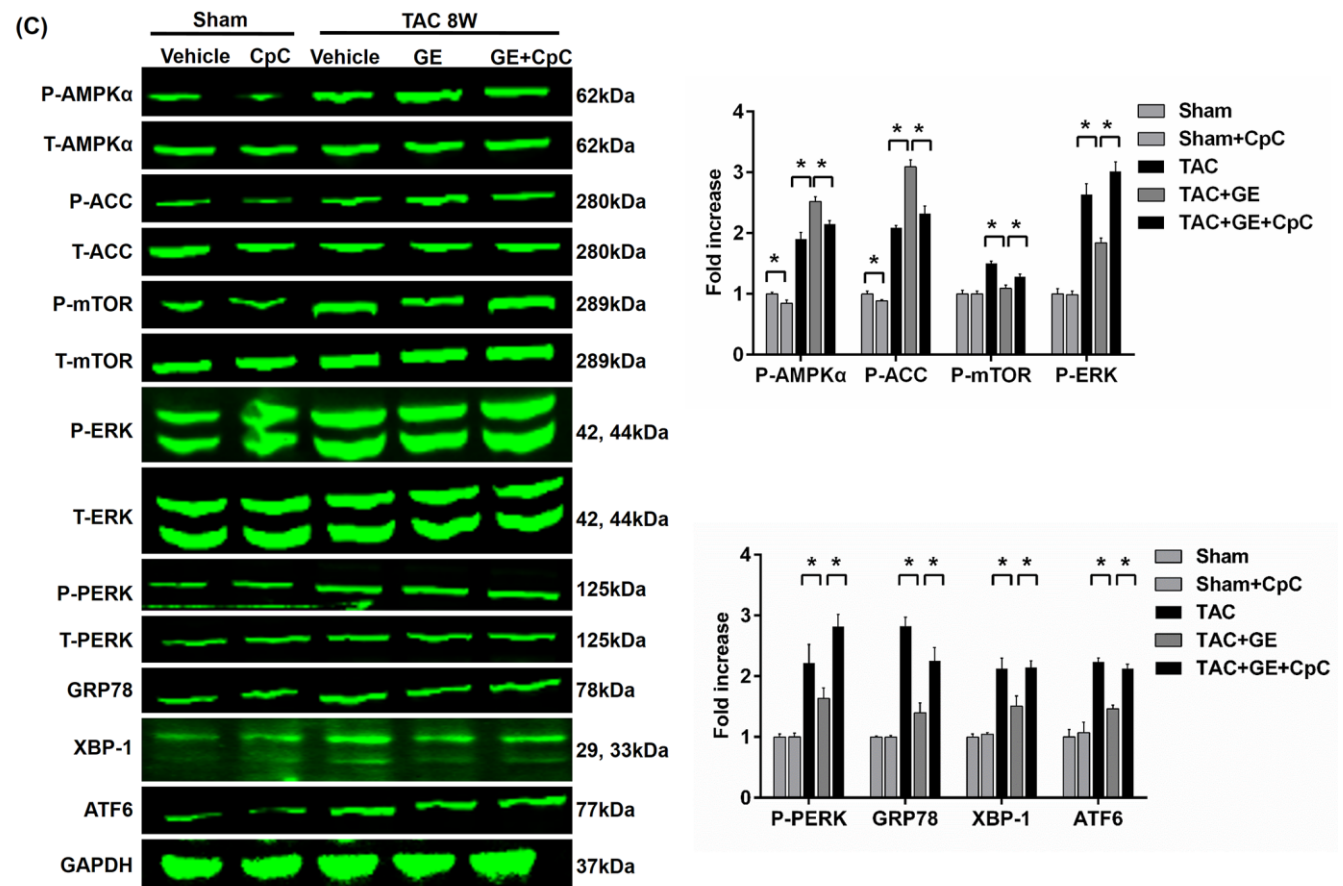

Figure S5. Compound (CpC) offset effects of geniposide (GE) on hypertrophy in vivo. A, Echocardiographic parameters in mice subjected to CpC (n=7). B, The mRNA expressions of hypertrophic markers (n=6). C, CpC attenuates 5'-adenosine monophosphate-activated protein kinase- $\alpha$  (AMPK $\alpha$ ) and related targets (n=6). \* $P < 0.05$  versus matched control.

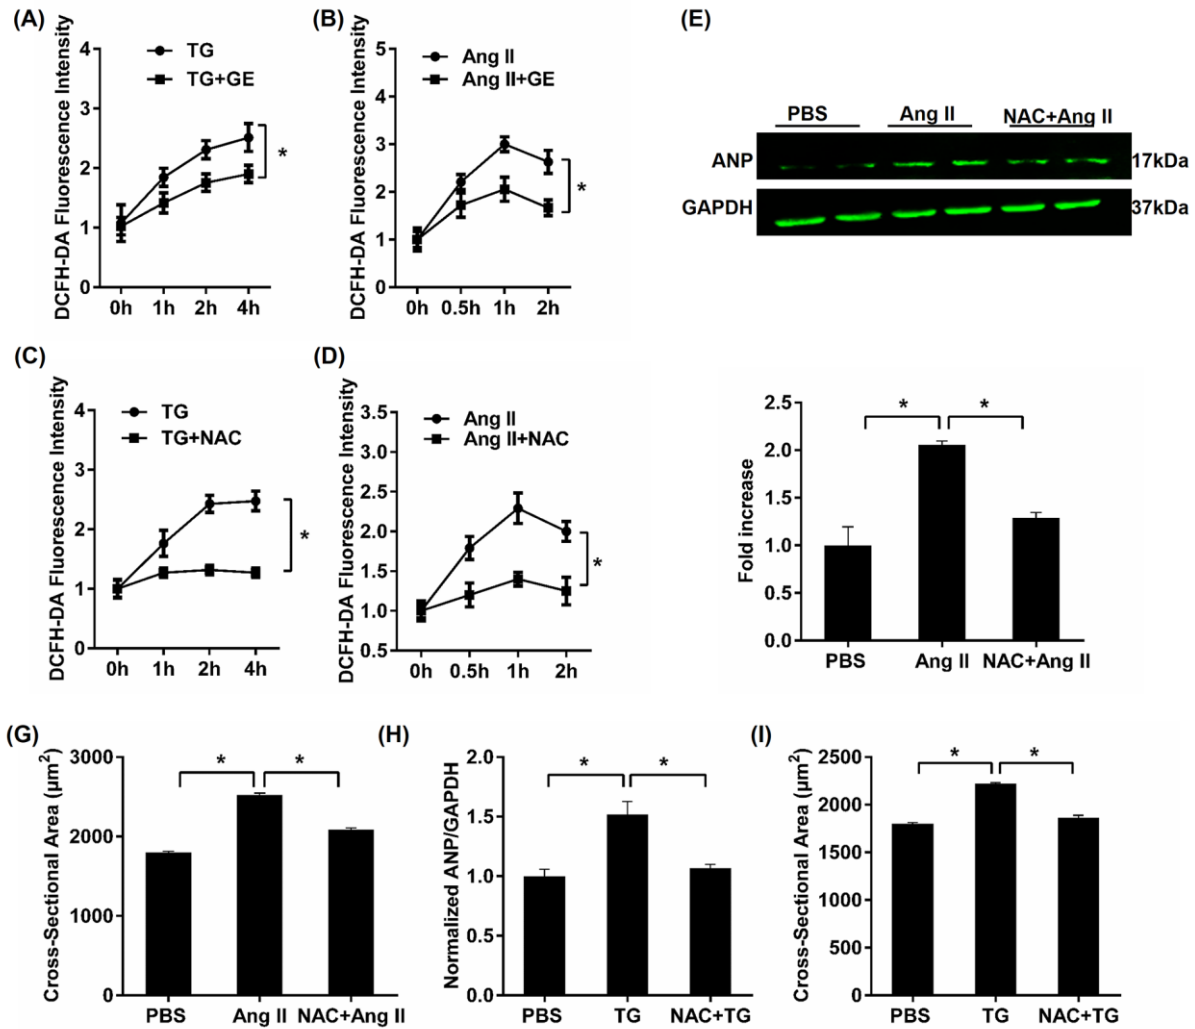

Figure S6. Endoplasmic stress induces accumulation of reactive oxygen species (ROS). A, Geniposide (GE) suppressed the accumulation of ROS induced by thapsigargin (TG). B, GE suppressed the accumulation of ROS induced by Angiotensin II (Ang II). C, N-acetylcysteine (NAC) blunted the accumulation of ROS induced by TG. D, NAC blunted the accumulation of ROS induced by Ang II. E-F, NAC almost completely abolished the increase of atrial natriuretic peptide (ANP) and cross-sectional area (n=6). G-H, NAC suppressed the increase of ANP and cross-sectional area induced by TG (0.5 $\mu\text{M}$  for 48h) (n=6). ROS were detected by DCFH-DA in 3 experiments independently. Statistical analysis of ROS was performed using a repeated measures ANOVA. \* $P<0.05$  versus matched control.

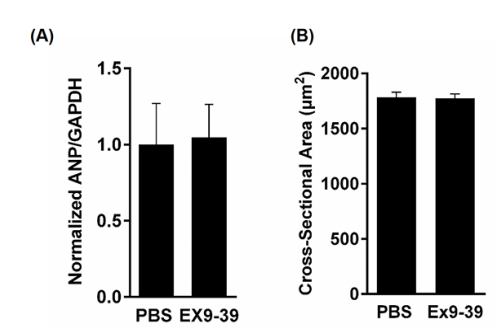

Figure S7. Atrial natriuretic peptide (ANP) and cross-sectional area of myocytes induced by Ex9-39 (n=6).

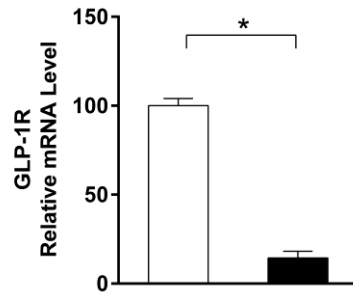

Figure S8. The mRNA levels of glucagon-like peptide 1 receptor (GLP-1R) in the hypertrophic heart after infection (n=8). \* $P < 0.05$  versus matched control.

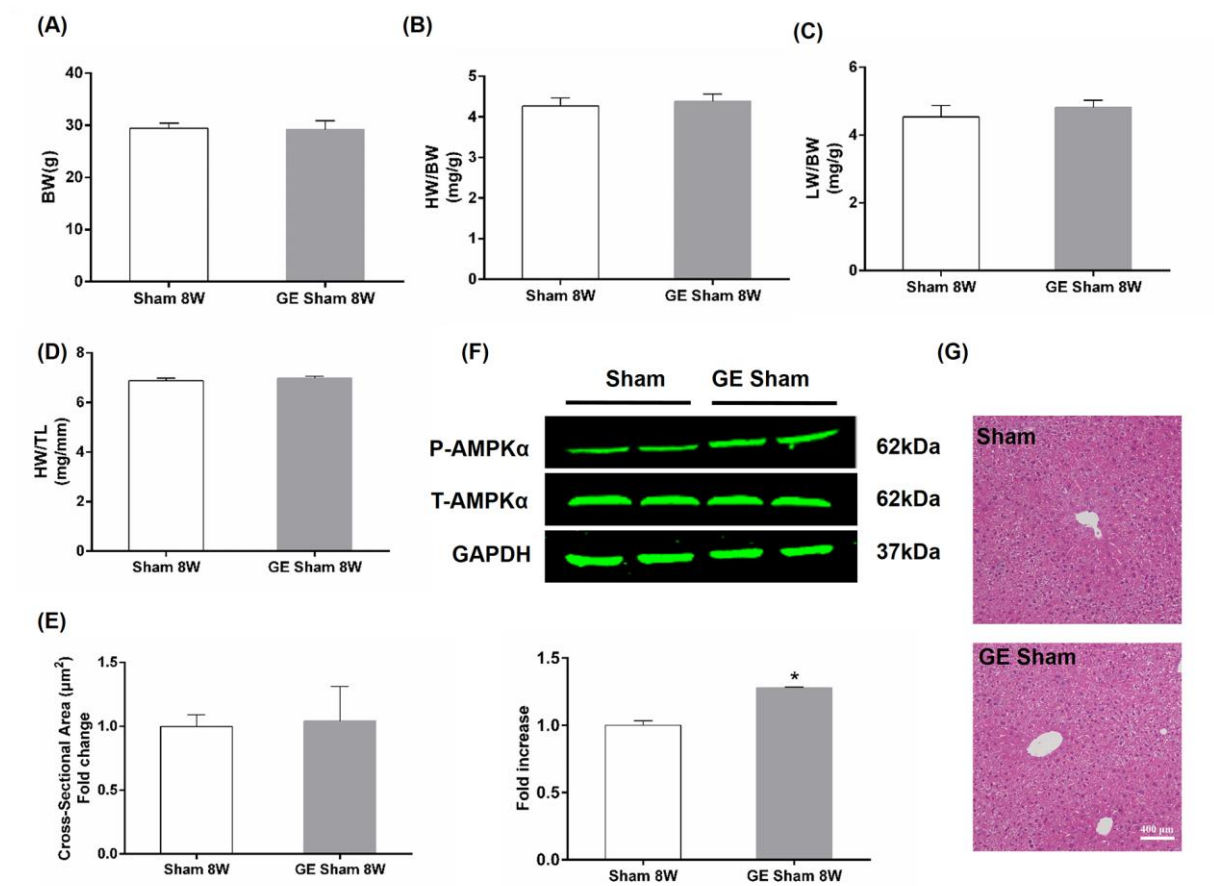

Figure S9. Effects of geniposide (GE) on the heart at baseline. A-D, Statistical results of body weight (BW), heart weight (HW)/BW, HW/tibial length (TL) of the indicated groups (n=6). E, The cross-sectional areas of myocytes (n=6). F, The protein levels of phosphorylated 5'-adenosine monophosphate-activated protein kinase- $\alpha$  (AMPK $\alpha$ ) in mice from indicated groups (n=6). G, Hepatic morphology after GE treatment (n=5). \*  $P < 0.05$  versus sham.
